# Supplementary material
Source: PubMed Central journal article supplement (PMC6082379)
Supplement: NIHMS977575-supplement-2.pdf [file NIHMS977575-supplement-2.pdf]

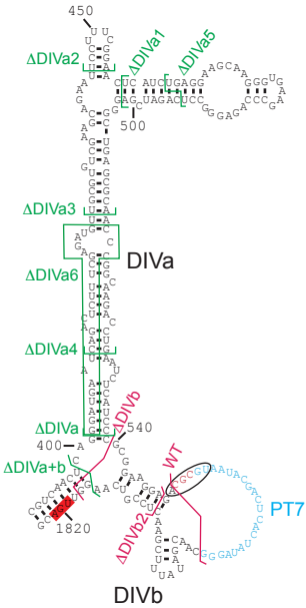

|          | Deletion Domain | Deletion Position (nt) | Insertion Loop | Mlu I site | T7 (nt) | Length (nt) | Mobility % |
|----------|-----------------|------------------------|----------------|------------|---------|-------------|------------|
| WT       | DIVb            | 551-1792               |                | +          | 23      | 677         | 100        |
| DIVb     | DIVb            | 540-1817               |                | -          | 23      | 639         | 28         |
| DIVb2    | DIVb            | 549-1807               |                | -          | 23      | 657         | 93 86      |
| DIVa5+b2 | DIVa+b          | 463-493, 549-1807      | GAAA           | -          | 23      | 630         | 28         |
| DIVa5    | DIVa            | 463-493                | GAAA           | +          | 23      | 650         | 100 105    |
| DIVa4    | DIVa            | 410-528                |                | +          | 23      | 558         | 0.0006     |
| DIVa3    | DIVa            | 429-513                |                | +          | 23      | 582         | 0.002      |
| DIVa2    | DIVa            | 446-455                |                | +          | 23      | 667         | 36         |
| DIVa1    | DIVa            | 458-501                |                | +          | 23      | 633         | 20         |
| DIVa6    | DIVa            | 402-426, 515-517       |                | +          | 24      | 649         | 0.004      |
| DIVa     | DIVa            | 402-540                |                | +          | 23      | 539         | 0.04       |
| DIVa+b   | DIVa+b          | 399-1814               |                | -          | 23      | 499         | 0.0008     |
