# Supplementary material
Source: PubMed Central journal article supplement (PMC6082379)

*Geobacillus stearothermophilus*  
strain 10  
3654829 bp

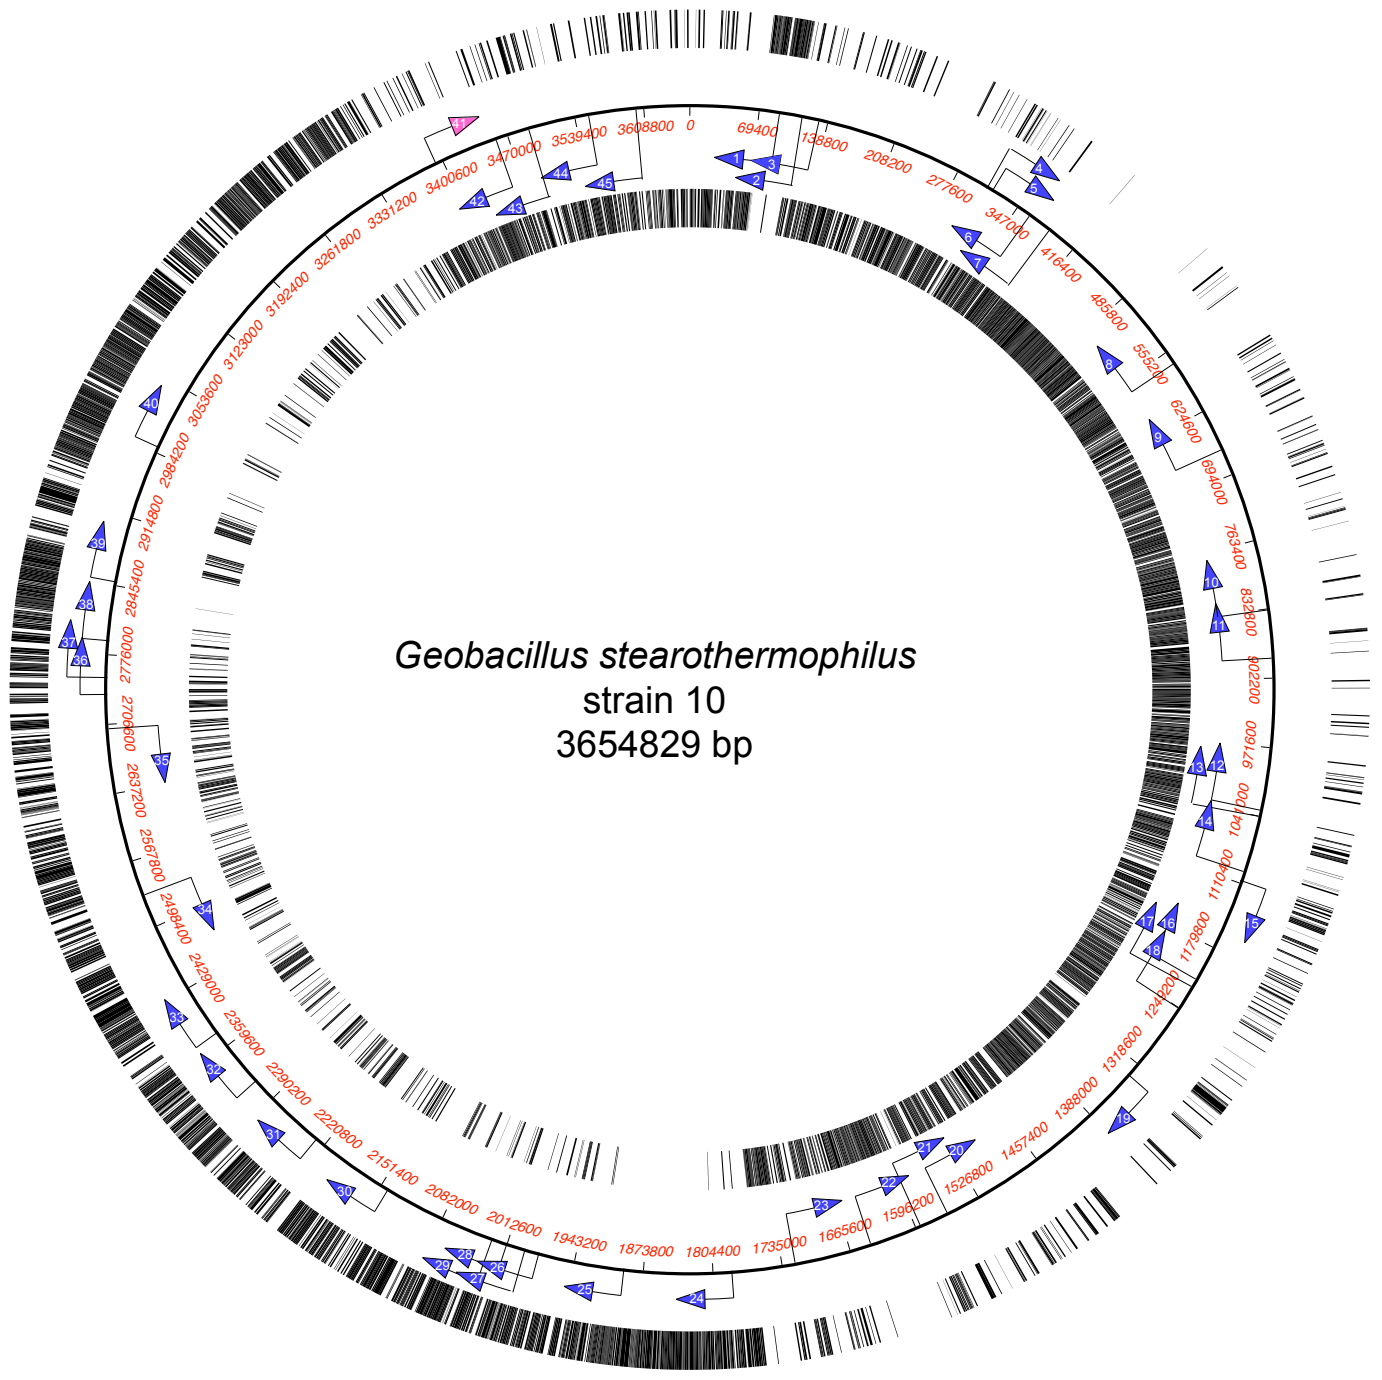

Supplement: NIHMS977575-supplement-1.pdf [file NIHMS977575-supplement-1.pdf]

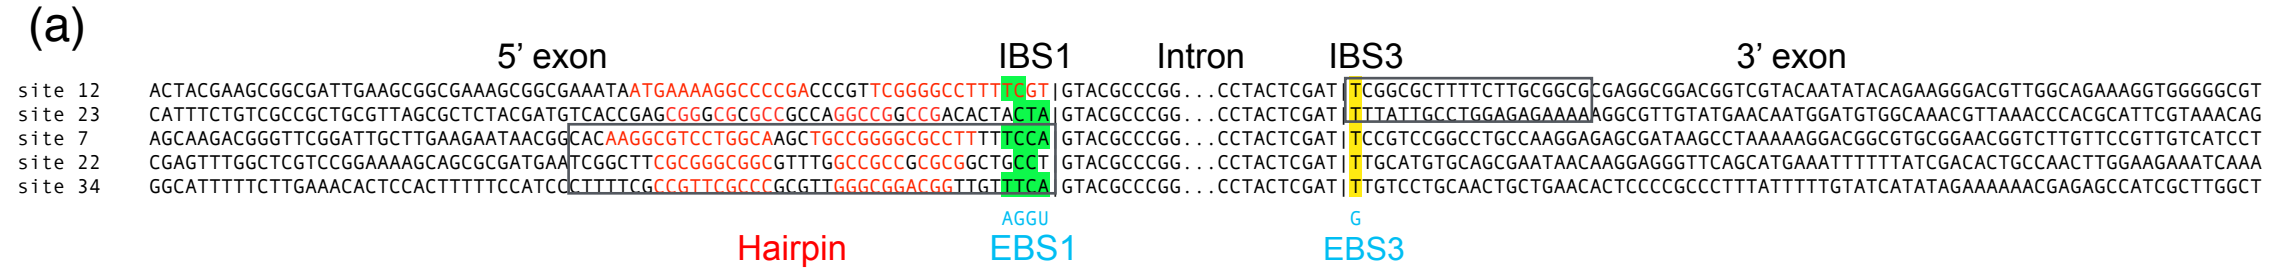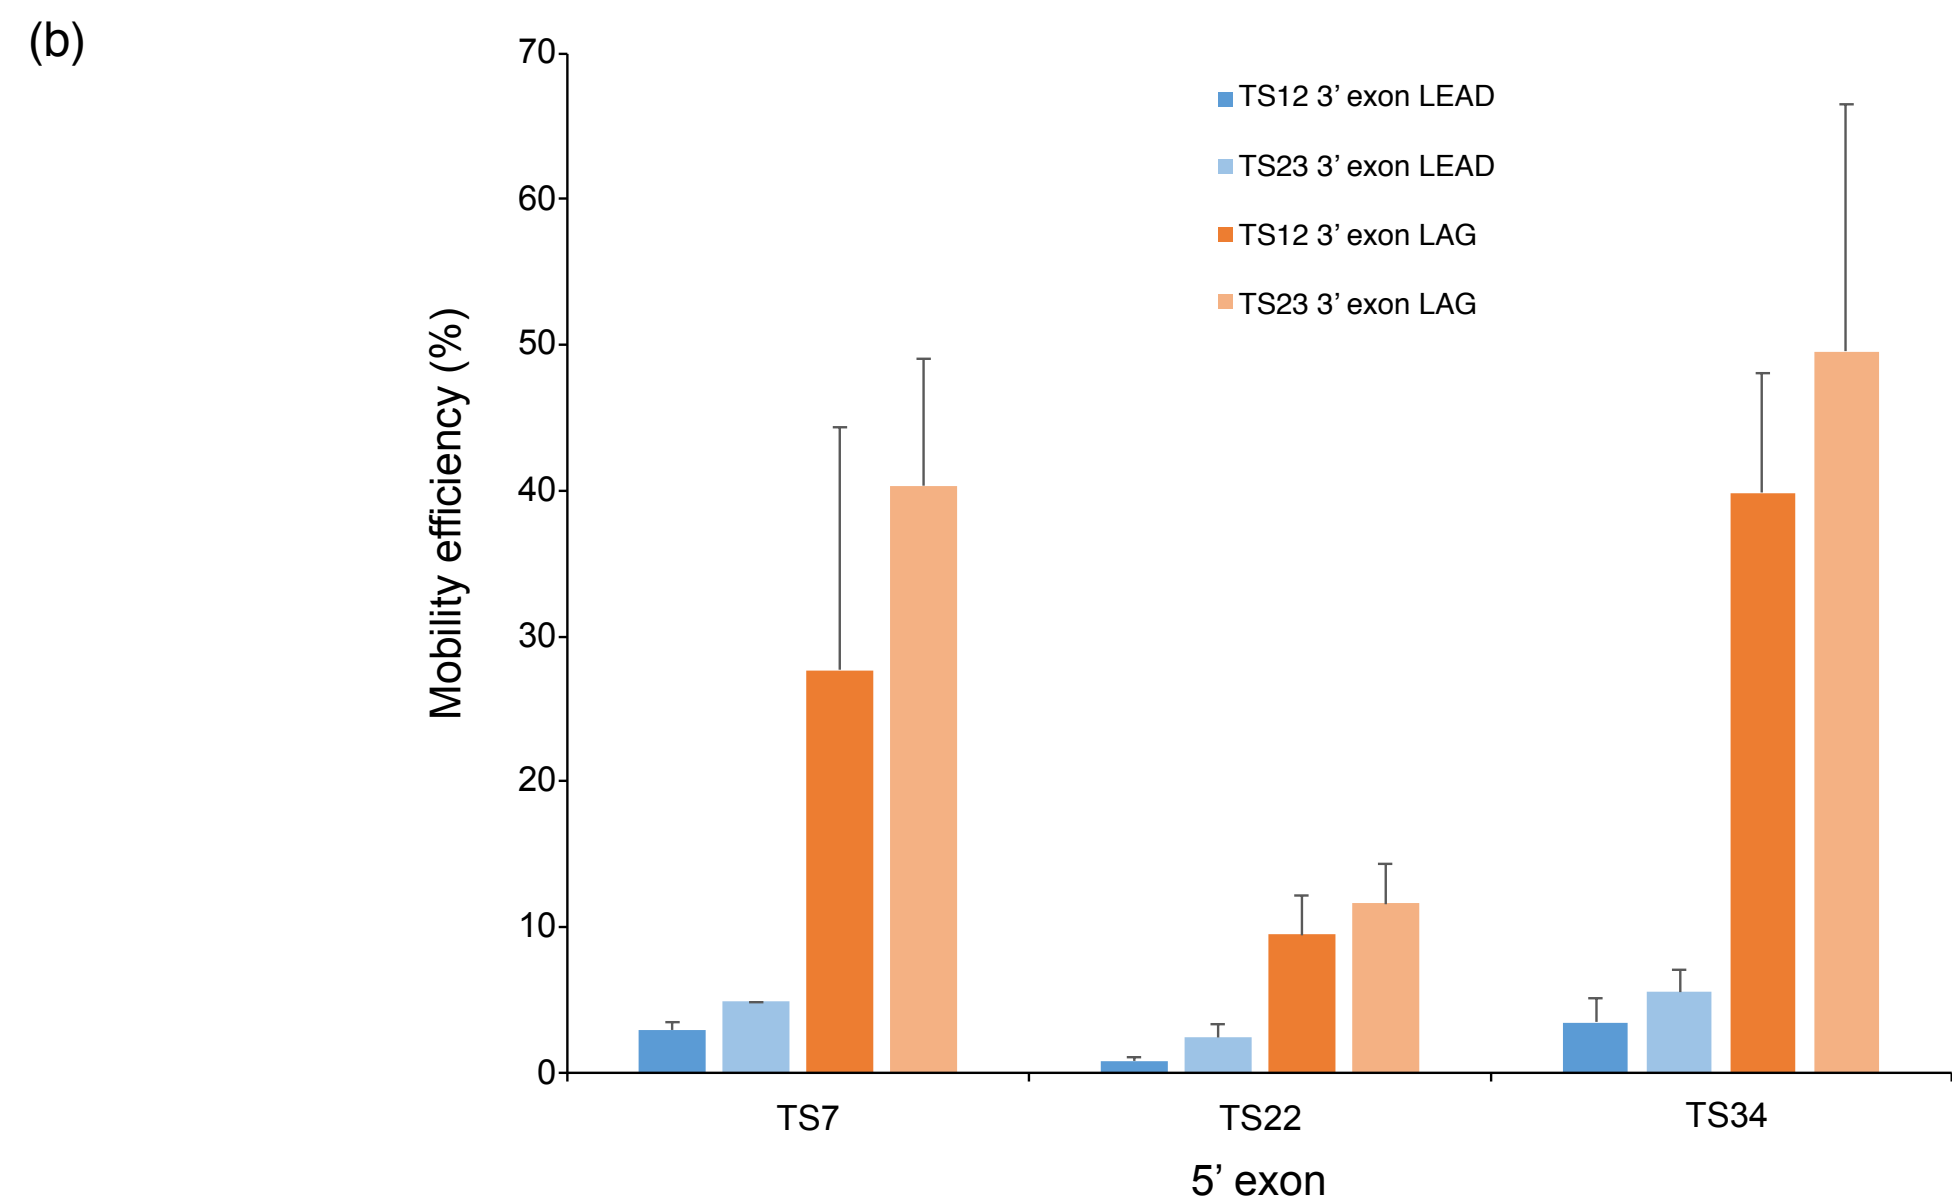

Supplement: NIHMS977575-supplement-3.pdf [file NIHMS977575-supplement-3.pdf]

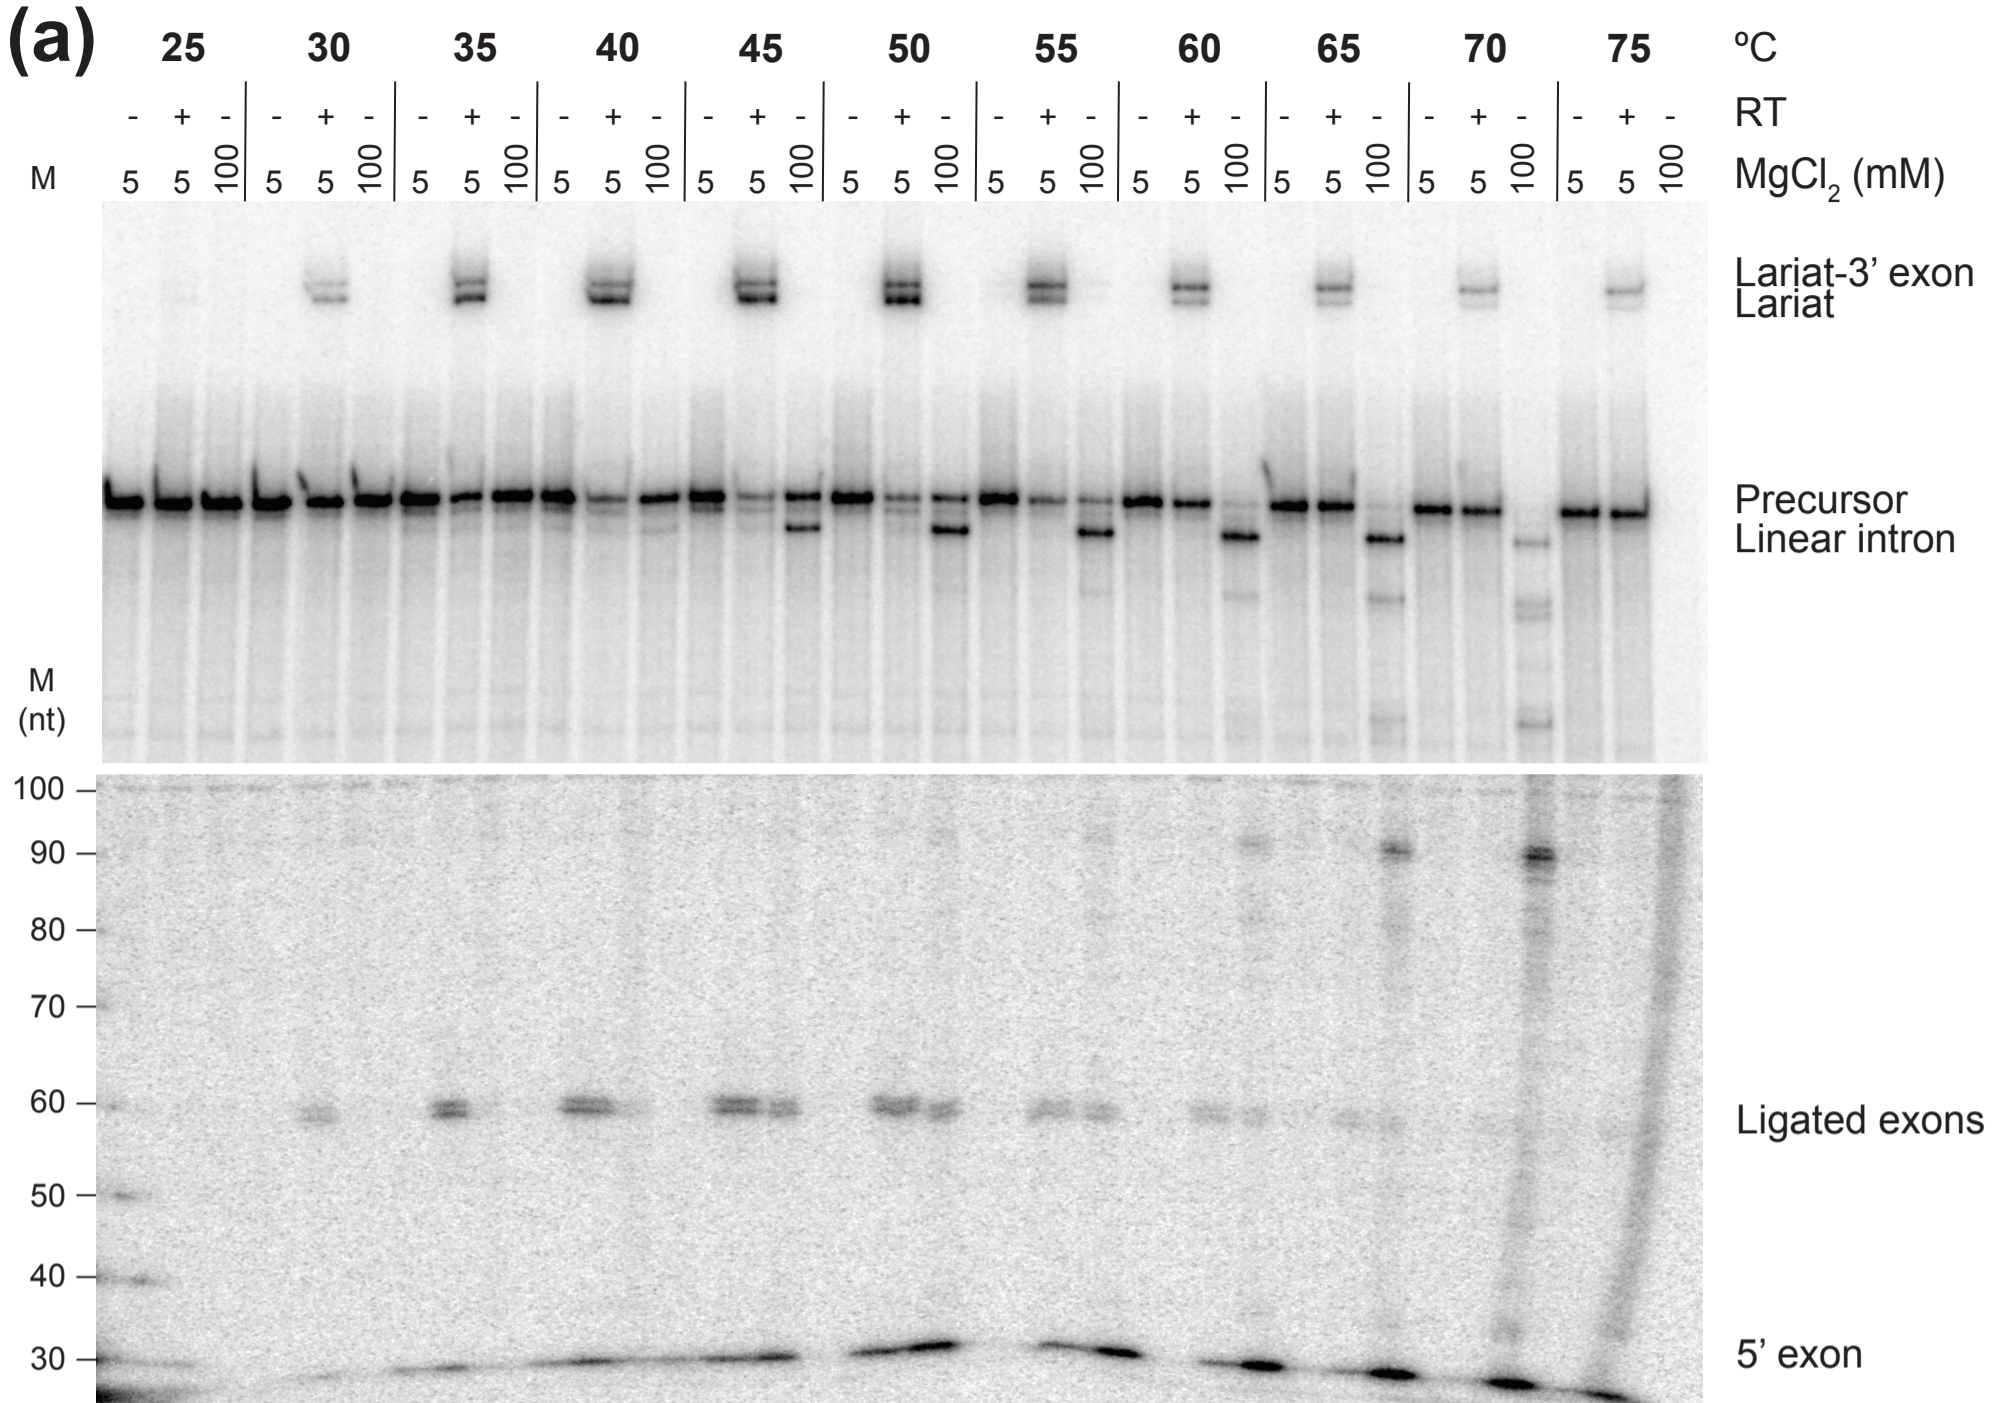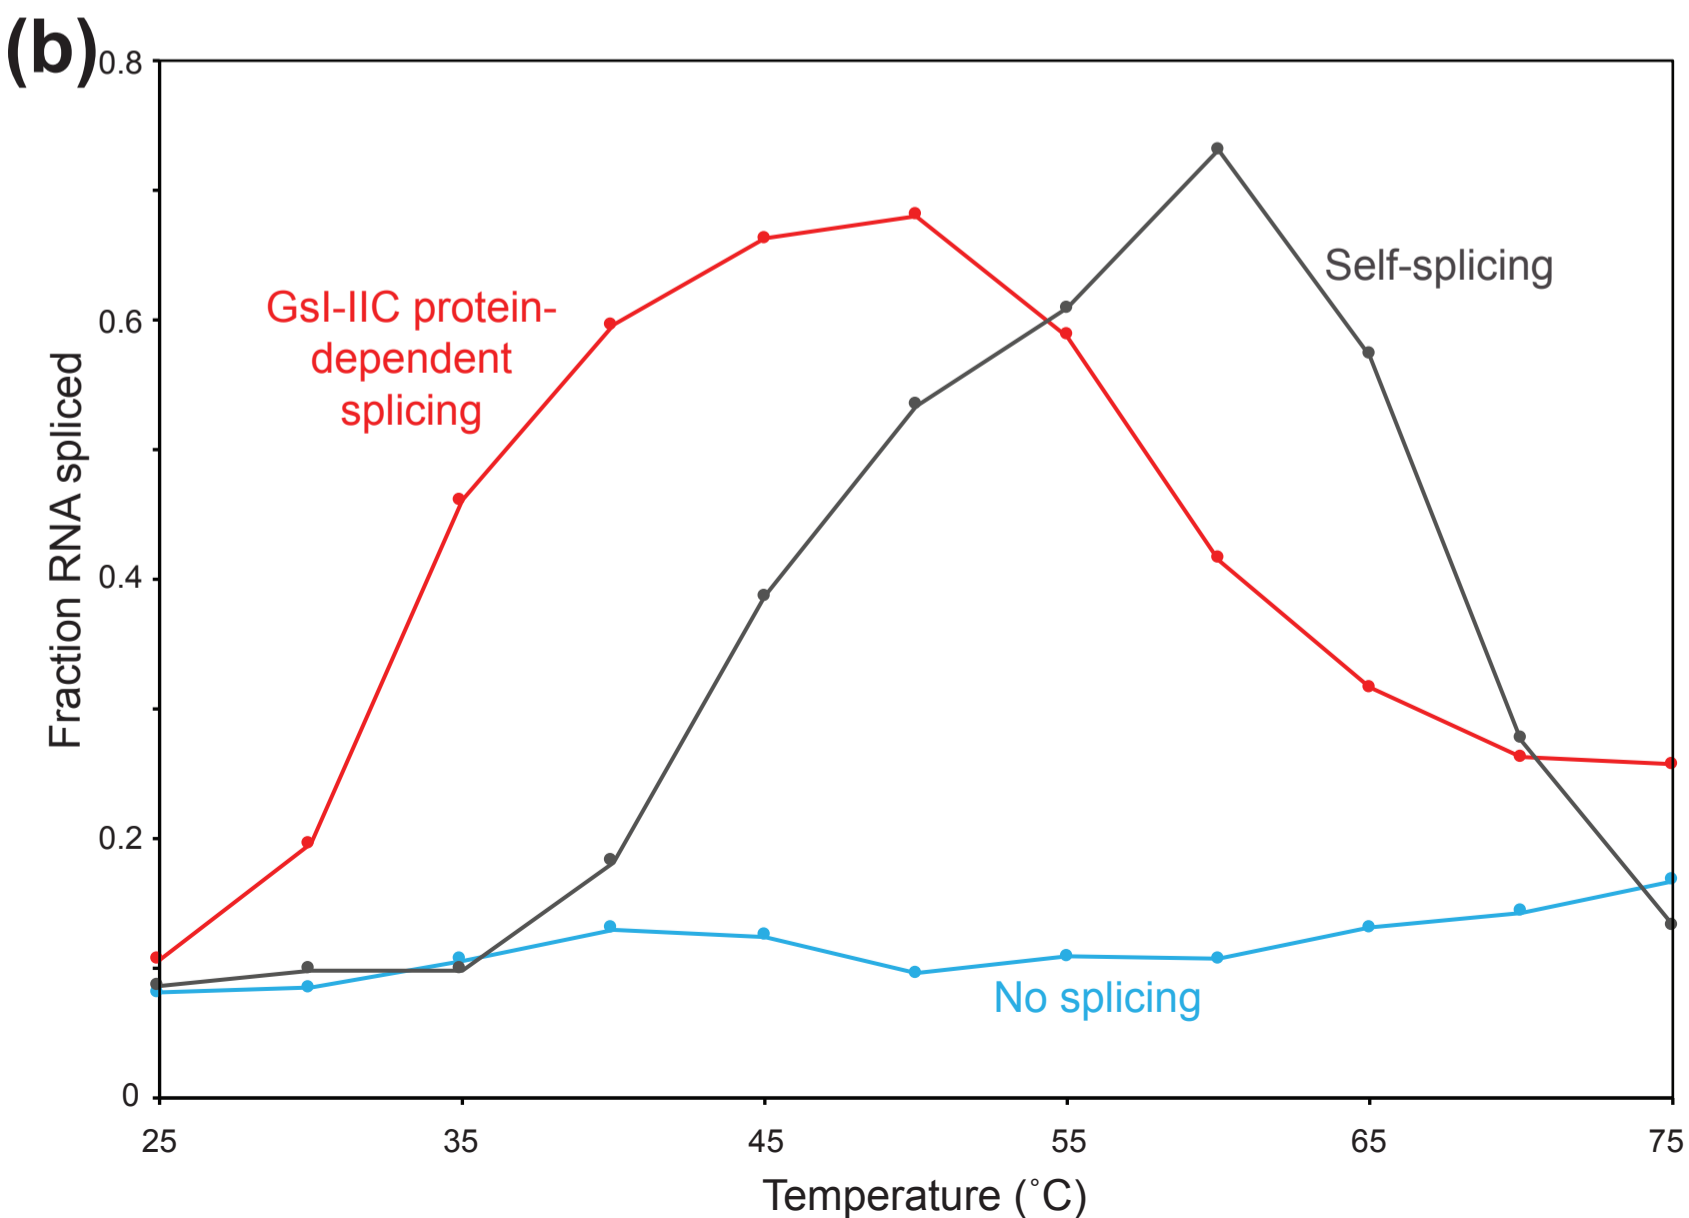

Supplement: NIHMS977575-supplement-4.pdf [file NIHMS977575-supplement-4.pdf]

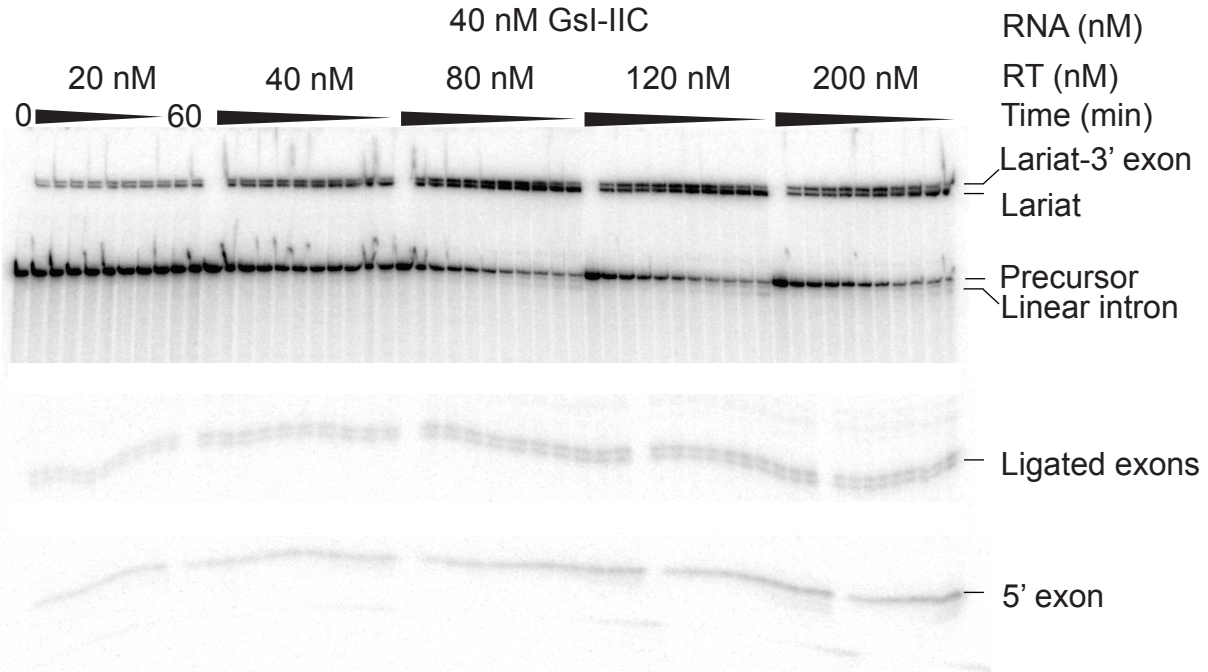

Supplement: NIHMS977575-supplement-5.pdf [file NIHMS977575-supplement-5.pdf]
